# Supplementary material for: A reversible gel-free electrode for continuous noninvasive electrophysiological signal monitoring
Source: Royal Society of Chemistry journal article supplement (doi:10.1039/d3tc00948c), 2023-01-01
Supplement: d3tc00948c1.pdf [file d3tc00948c1.pdf]

## Supporting Information

A Reversible Gel-Free Electrode for Continuous Noninvasive Electrophysiological Signals Monitoring

Qing Liu <sup>a</sup>, Jie Zhou <sup>a, b</sup>, Liangtao Yang <sup>a, \*</sup>, Jiajia Xie <sup>a, b</sup>, Chenhui Guo <sup>a, c</sup>, Zimo Li <sup>d</sup>, Jun Qi <sup>e</sup>, Shuo Shi <sup>f</sup>, Zhilin Zhang <sup>a</sup>, Hui Yang <sup>a</sup>, Jinlian Hu <sup>f</sup>, Jinglong Wu <sup>a</sup>, Yi Zhang <sup>a, \*</sup>.

<sup>a</sup> Shenzhen Institute of Advanced Technology, Chinese Academy of Sciences, Shenzhen, 518055, China.

<sup>b</sup> College of Optoelectronic Engineering, Chengdu University of Information Technology, Chengdu, 610225, China.

<sup>c</sup> Department of Nano Science and Technology Institute, University of Science and Technology of China, Suzhou, 215127, China.

<sup>d</sup> Graduate School of Interdisciplinary Science and Engineering in Health Systems, Okayama University, Okayama, Japan.

<sup>e</sup> Lu'an Branch, Anhui Institute of Innovation for Industrial Technology, Lu'an, 237100, China.

<sup>f</sup> Department of Biomedical Engineering, City University of Hong Kong, Hong Kong S.A.R, 999077, China.

\* Corresponding author. Shenzhen Institute of Advanced Technology, Chinese Academy of Sciences, Shenzhen, 518055, China.

E-mail: liangtao.yang@siat.ac.cn (L. Yang), yi.zhang3@siat.ac.cn (Y. Zhang).

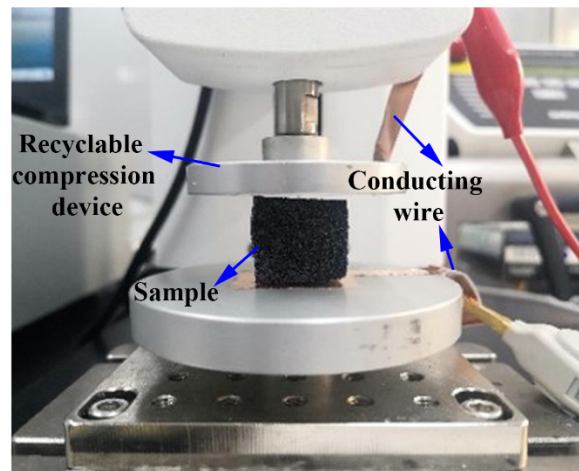

Test setup diagram

Fig S1. Illustration of mechanical and impedance measurement setup

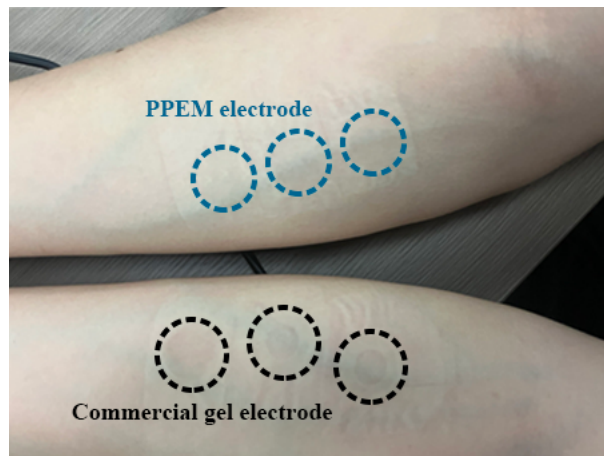

Fig S2. Skin condition after continuous monitoring of EMG signals for 8 hours.

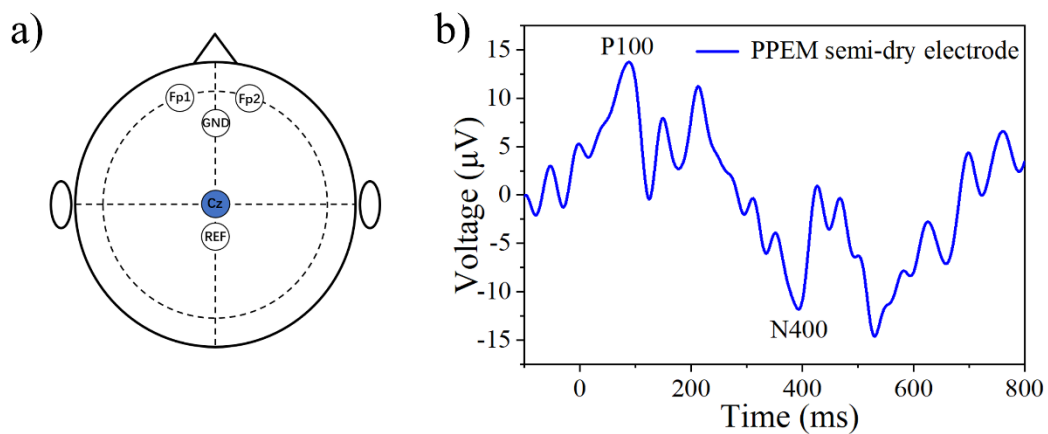

Fig S3. a) Schematic diagram of electrode placement for EEG monitoring at Cz; b) P, N signal monitoring of PPEM semi-dry electrode.
